# Supplementary material for: Effects of the Implementation of an Emergency Surgical Pattern in Patients with Rhegmatogenous Retinal Detachment: A Retrospective Observational Study
Source: Hindawi journal article supplement (doi:10.1155/2022/4240225), 2022-10-14
Supplement: f1 [file 4240225.f1.zip]

Painless Visual Loss

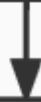

Emergency Triage

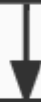

Round-the-clock  
Specialist Consultation

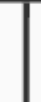

Diagnosis With RRD

Finish Preoperative  
Assessment

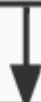

Emergency Surgery

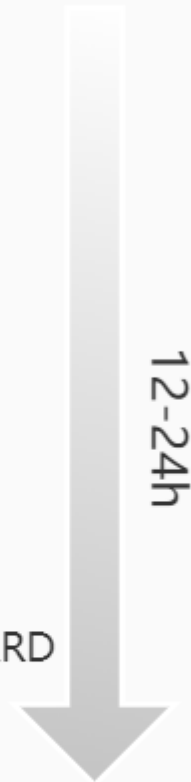

12-24h

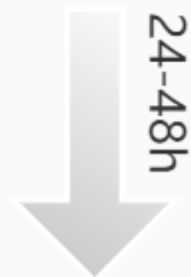

24-48h
